# Supplementary material for: The effects of resistance training to near volitional failure on motor unit recruitment during neuromuscular fatigue
Source: PeerJ. 2024 Oct 14;12:e18163. doi: 10.7717/peerj.18163 (PMC11485100; doi:10.7717/peerj.18163)
Supplement: Supplemental Information 3 — Raw 30% sEMG torque steadiness for each participant. The raw 30% sEMG torque steadiness was used for statistical analysis described in the methods. [file peerj-12-18163-s003.xlsx]

## Sheet: Demographics
ID	Group (F=0, NF=1)	Sex (Male=0, Female =1)	Age	Self Reported Training Age (years)
PLC01	0	0	27	12
PLC02	1	0	27	14
PLC03	0	0	30	4
PLC05	1	1	25	3
PLC06	0	1	23	7
PLC07	1	0	21	7
PLC08	1	0	26	10
PLC10	1	0	21	4
PLC11	0	0	22	5
PLC13	1	1	26	12
PLC14	0	1	25	6
PLC15	1	0	21	2
PLC17	0	0	24	1
PLC18	1	1	26	0.5
PLC19	0	1	21	2
PLC20	0	0	22	5
PLC21	0	0	22	8
PLC22	1	1	24	9
PLC25	0	1	29	3

## Sheet: Torque Time
ID	Group (F=0, NF=1)	Sex (Male=0, Female =1)	Pre constant torque time	Post constant torque time
PLC01	0	0	155.3	203.6
PLC02	1	0	71.9	100.9
PLC03	0	0	67.3	101.3
PLC05	1	1	237.7	377.7
PLC06	0	1	193.5	241.2
PLC07	1	0	237.5	191.1
PLC08	1	0	209.6	256.5
PLC10	1	0	67	144.42
PLC11	0	0	193.9	198.7
PLC13	1	1	192.8	239.2
PLC14	0	1	105.5	194.5
PLC15	1	0	100.4	150.1
PLC17	0	0	64.5	107.1
PLC18	1	1	152.9	154.9
PLC19	0	1	60.5	147.7
PLC20	0	0	61.9	102.5
PLC21	0	0	65.6	151.9
PLC22	1	1	191.2	198.3
PLC25	0	1	155.5	150

## Sheet: Torque Steadiness
		PRE 30% MVC Torque REP 1						PRE 30% MVC Torque REP 2						PRE 30% MVC Torque REP 3						PRE 30% MVC Torque REP 4						PRE 30% MVC Torque REP 5						PRE 30% MVC Torque REP 6						PRE 30% MVC Torque REP 7						PRE 30% MVC Torque REP 8
ID	Group	Beg SD (V)	Beg CV (%)	Mid SD (V)	Mid SD (%)	End SD (V)	End CV (%)	Beg SD (V)	Beg CV (%)	Mid SD (V)	Mid SD (%)	End SD (V)	End CV (%)	Beg SD (V)	Beg CV (%)	Mid SD (V)	Mid SD (%)	End SD (V)	End CV (%)	Beg SD (V)	Beg CV (%)	Mid SD (V)	Mid SD (%)	End SD (V)	End CV (%)	Beg SD (V)	Beg CV (%)	Mid SD (V)	Mid SD (%)	End SD (V)	End CV (%)	Beg SD (V)	Beg CV (%)	Mid SD (V)	Mid SD (%)	End SD (V)	End CV (%)	Beg SD (V)	Beg CV (%)	Mid SD (V)	Mid SD (%)	End SD (V)	End CV (%)	Beg SD (V)	Beg CV (%)	Mid SD (V)	Mid SD (%)	End SD (V)	End CV (%)
PLC01	F	0.02224	3.77998	0.01245	2.09805	0.01666	2.72928	0.02049	3.52163	0.01101	1.79878	0.02928	4.94742	0.01656	2.71183	0.04247	7.87097	0.035	6.15789	0.01552	2.66904
PLC02	NF	0.01644	2.1175	0.0253	2.92381	0.04357	5.33617	0.03363	4.33982	0.02706	3.35726	0.07853	10.1941	0.04964	5.87336	0.03009	4.03137
PLC03	F	0.02323	2.60925	0.00883	1.01539	0.01075	1.22466	0.01202	1.38744	0.01478	1.75344	0.02506	2.9694	0.01973	2.24713	0.01616	1.99885
PLC05	NF	0.00755	2.67316	0.01054	3.72053	0.01158	4.1657	0.00914	3.25516	0.00681	2.45421	0.01228	4.52264	0.00753	2.65386	0.00872	3.2583	0.01806	6.46309	0.00918	3.32463	0.01292	4.94478	0.01319	5.33886	0.00666	2.35607	0.03053	11.2149	0.01011	3.74898	0.0075	3.15015
PLC06	F	0.00437	1.11181	0.01141	2.72978	0.0076	1.78493	0.00522	1.292	0.00976	2.47428	0.00837	2.07684	0.00678	1.63956	0.02089	5.41992	0.0175	4.68415	0.00614	1.51405	0.01353	3.6478	0.03431	8.78548	0.03363	8.27638	0.02094	5.67894	0.03012	7.91441	0.01408	3.59273
PLC07	NF	0.01153	1.85038	0.00963	1.55971	0.01436	2.40329	0.00704	1.11805	0.02114	3.55715	0.0159	2.6067	0.01022	1.53239	0.00795	1.35547	0.01603	2.66826	0.00802	1.19333	0.02954	5.01908	0.0162	2.80561	0.00683	0.970114	0.01266	2.16597	0.01416	2.41473	0.02817	4.14484
PLC08	NF	0.03374	5.39564	0.00498	0.705312	0.0253	3.69463	0.01646	2.34727	0.00833	1.18943	0.02181	3.2046	0.01897	2.66521	0.02349	3.385	0.0261	3.86553	0.04095	6.04669	0.02129	2.95217	0.02911	4.1315	0.02459	3.71935	0.02527	4.02476	0.02291	3.33017	0.03065	4.0275	0.01396	2.0001
PLC10	NF	0.0192	2.28199	0.01617	1.94806	0.01724	2.09459	0.02446	3.06834	0.02272	2.81176	0.04236	5.40212	0.01129	1.3848	0.02791	3.97249
PLC11	F	0.01392	1.83998	0.01693	2.32865	0.01937	2.50691	0.0142	1.86659	0.00779	1.02566	0.01161	1.52523	0.00775	0.999228	0.01623	2.12747	0.01598	2.12643	0.03029	3.86877	0.02908	3.82409	0.0582	7.31791	0.00567	0.722041	0.04201	5.68251	0.032	4.79581	0.05031	6.85608
PLC13	NF	0.01616	3.51284	0.00983	2.16091	0.00843	1.89614	0.00912	1.98691	0.00847	1.85757	0.03455	7.73211	0.01162	2.42344	0.02245	5.18568	0.02034	4.53246	0.00863	1.93647	0.01545	3.54353	0.02272	5.1487	0.01387	3.0504	0.0076	1.62373	0.01892	4.67684	0.01659	3.94997
PLC14	F	0.01883	4.11347	0.01392	2.86589	0.01549	3.1233	0.01846	3.86301	0.01529	3.29987	0.02081	4.45154	0.02302	4.63347	0.04147	9.2009	0.04867	10.225	0.03231	6.58713
PLC15	NF	0.01737	3.28047	0.0069	1.35391	0.01524	2.89571	0.00911	1.71884	0.0146	2.8959	0.01297	2.68247	0.00669	1.27398	0.01655	3.86029	0.01326	3.7162	0.00655	1.19663
PLC17	F	0.01454	2.84604	0.00889	1.70789	0.01605	3.0915	0.02512	4.82484	0.01156	2.32031	0.02187	4.38663	0.01674	3.41264
PLC18	NF	0.01022	2.74091	0.00919	2.38489	0.01283	3.47959	0.00708	1.82743	0.01173	3.07774	0.00897	2.4615	0.00343	0.858085	0.01429	3.85577	0.01975	5.65872	0.00688	1.51335	0.01359	3.90714	0.0162	5.50882	0.00832	2.15078
PLC19	F	0.0108	2.80486	0.00366	0.911695	0.01236	3.14134	0.0214	5.54735	0.02057	5.63115	0.01757	5.29852	0.02409	6.11268
PLC20	F	0.03404	4.63835	0.01416	1.93151	0.01578	2.19621	0.00906	1.25782	0.01598	2.35297	0.02311	3.5848	0.01828	2.39543	0.01818	2.67894	0.02575	4.38729	0.0366	4.91212
PLC21	F	0.0074	1.32671	0.0087	1.56401	0.00802	1.41813	0.0057	1.0145	0.01596	2.86673	0.01458	2.67539	0.00736	1.2714
PLC22	NF	0.0061	1.30668	0.01107	2.37851	0.00519	1.10722	0.00635	1.35257	0.0108	2.41222	0.02991	7.12191	0.00502	1.05016	0.03442	8.92025	0.03401	9.15172	0.00918	2.02647	0.02519	8.304	0.01681	4.99905	0.02033	4.65532	0.01401	3.89285	0.0065	2.12202	0.03077	7.14173
PLC25	F	0.00669	1.73312	0.00963	2.43715	0.00443	1.12892	0.01437	3.56922	0.01033	2.65241	0.01141	2.97027	0.00296	0.740244	0.01265	3.34401	0.00559	1.59228	0.0074	1.89701	0.00655	1.76788	0.02431	6.82717	0.0075	1.93363
[truncated: 72 more columns]

## Sheet: Torque Steadiness BegMidEnd
ID	Group (F=0, NF=1)	Sex (Male=0, Female =1)	PRE Torque BEG	PRE Torque MID	PRE Torque END	POST Torque BEG	POST Torque MID	POST Torque END
PLC01	0	0	3.77998	1.79878	6.15789	0.02383	3.68462	3.85625
PLC02	1	0	2.1175	3.35726	10.1941	0.01635	4.30756	5.28282
PLC03	0	0	2.60925	1.75344	2.9694	0.01218	1.11174	1.31156
PLC05	1	1	2.67316	2.45421	3.74898	0.00727	1.56085	19.3993
PLC06	0	1	1.11181	3.2583	7.91441	0.00484	1.13394	2.32304
PLC07	1	0	1.85038	1.35547	2.41473	0.00914	1.58429	3.52062
PLC08	1	0	5.39564	2.95217	3.33017	0.03321	2.41407	2.88832
PLC10	1	0	2.28199	2.81176	5.40212	0.00703	5.85889	6.28365
PLC11	0	0	1.83998	2.12747	4.79581	0.01519	2.60056	5.40445
PLC13	1	1	3.51284	5.18568	4.67684	0.01725	4.03664	6.27649
PLC14	0	1	4.11347	3.29987	10.225	0.02513	3.47473	6.7001
PLC15	1	0	3.28047	2.8959	3.7162	0.00541	1.88377	2.17724
PLC17	0	0	2.84604	1.70789	4.38663	0.00896	1.94357	3.47633
PLC18	1	1	2.74091	3.85577	5.50882	0.00612	2.32542	4.04884
PLC19	0	1	2.80486	0.911695	5.29852	0.01192	4.11098	6.03669
PLC20	0	0	4.63835	2.35297	4.38729	0.01339	3.34439	5.74297
PLC21	0	0	1.32671	1.56401	2.67539	0.0076	3.67651	3.62324
PLC22	1	1	1.30668	8.92025	2.12202	0.00921	1.61963	1.2213
PLC25	0	1	1.73312	3.34401	6.82717	0.00415	2.35752	7.3745

## Sheet: EMG Amplitude BEG MID END
ID	Group (F=0, NF=1)	Sex (Male=0, Female =1)	PRE EMG BEG	PRE EMG MID	PRE EMG END	POST EMG BEG	POST EMG MID	POST EMG END
PLC01	0	0	42.3	52.575	67.65	53.8	57.425	70.7
PLC02	1	0	59.2	83.225	74.775	57.2	78.325	81.3
PLC05	1	1	50.325	51.2	50.975	50.35	52.375	54
PLC06	0	1	52.625	62.125	71.7	56.325	61.1	78.5
PLC07	1	0	59.875	73.825	105.7	60.325	83.675	73.475
PLC08	1	0	63.275	118.15	156.45	76.7	131.05	162.175
PLC10	1	0	84.95	110.775	121.55	55.675	59.725	63.575
PLC11	0	0	84.375	206.95	346.4	59.875	69.875	134.525
PLC13	1	1	57.875	73.65	81.15	53.8	58.55	78.775
PLC14	0	1	48.95	53.8	54.325	54.25	61.125	61.675
PLC15	1	0	103.675	157.55	148.95	79.225	92.15	86.725
PLC17	0	0	55.975	59.95	79.825	71.875	110.675	133.525
PLC18	1	1	60.275	81.425	114.525	61.35	72.8	95
PLC19	0	1	52.125	54.5	61.425	59.1	61.525	71.075
PLC20	0	0	71.575	98.225	91.5	54.4	69.575	71.95
PLC21	0	0	85.625	109.95	156.475	94.8	194.975	206.375
PLC22	1	1	63.975	108.225	132.75	55.85	83.575	78.15
PLC25	0	1	57.65	63.75	61.15	58.5	62.175	56.625

## Sheet: EMG Amplitude
	PRE 30% MVC Torque REP 1			PRE 30% MVC Torque REP 2			PRE 30% MVC Torque REP 3			PRE 30% MVC Torque REP 4			PRE 30% MVC Torque REP 5			PRE 30% MVC Torque REP 6			PRE 30% MVC Torque REP 7			PRE 30% MVC Torque REP 8			PRE 30% MVC Torque REP 9			PRE 30% MVC Torque REP 10			POST 30% MVC Torque REP 1			POST 30% MVC Torque REP 2			POST 30% MVC Torque REP 3			POST 30% MVC Torque REP 4			POST 30% MVC Torque REP 5			POST 30% MVC Torque REP 6			POST 30% MVC Torque REP 7
ID	Beg	Mid	End	Beg	Mid	End	Beg	Mid	End	Beg	Mid	End	Beg	Mid	End	Beg	Mid	End	Beg	Mid	End	Beg	Mid	End	Beg	Mid	End	Beg	Mid	End	Beg	Mid	End	Beg	Mid	End	Beg	Mid	End	Beg	Mid	End	Beg	Mid	End	Beg	Mid	End	Beg
PLC01	42.3	45.7	35.7	44.8	52.575	56.425	49.1	58.5	67.65	54.525																					53.8	54.8	58.375	56.225	61.425	63.075	57.425	68.725	64.8	62.275	75.55	70.7	65.45	83.825
PLC02	59.2	65.85	74.7	73.675	83.225	74.775	79.625	85.125																							57.2	57.075	69.75	70.625	71.85	73.725	78.325	82.525	81.3	84.525
PLC05	50.325	50.575	51.55	51.025	51	51.225	51.025	50.6	51.2	50.6	50.4	51.975	51.15	52.175	50.975	51															50.35	50.95	51.5	51.275	51.35	51.875	50.825	51.8	52.025	50.85	51.55	51.85	51.125	49.225	52.375	51.325	52.525	52.65	50.95
PLC06	52.625	57.575	60.625	54.05	56.1	61.375	56.55	60.425	62.125	55.225	61.325	67.45	56.35	64.7	71.7	59.9															56.325	59.65	61.425	58.025	61.775	63.725	60.525	66.2	69.575	61.1	71.35	74.225	63.625	73.75	75.675	67.35	77.925	78.5	69.075
PLC07	59.875	63.225	66.575	62.15	72.475	79.225	69.175	83.7	73.825	75.55	93.625	97.625	100.575	106.575	105.7	115.125															60.325	63.975	67.875	70.275	75.4	78.3	73.7	83.15	83.675	75.175	92.05	86.625	89.575	103.7	73.475	110.35
PLC08	63.275	93.525	85.375	80.225	100.25	102.25	95.25	113.5	118.15	100.625	124.75	152.525	127.05	133.325	156.45	146.575	204.275														76.7	89.1	91.875	89.55	109.9	104.725	102.7	121.975	121.15	116.025	131.05	138.525	127.475	167.85	162.875	146.175	191.4	240.05	UNREADABLE
PLC10	84.95	90.025	101.35	97.95	110.775	121.55	108.35	132.125																							55.675	56.5	59.9	58.65	61.925	63.6	59.725	68.325	69.175	63.5	73.5	63.575	69.2
PLC11	84.375	86.975	103.5	119.3	125.625	151.3	133.425	163.025	206.95	163.05	232.975	313.5	203.65	308.9	346.4	307.875															59.875	67.9	69.5	64.775	78.175	83.5	69.875	87.65	94.05	73.775	109.375	134.525	80.8
PLC13	57.875	58.225	58.275	59.925	62.125	61.25	63.9	68.125	73.65	66.125	72	85.35	67.4	92.1	81.15	66.775															53.8	55.925	57.725	56.075	57.7	59.875	56.925	60.775	62.025	58.55	63.875	68.35	60.375	67.475	69.8	61.675	69.425	78.775	63.25
PLC14	48.95	51.125	51.85	52.475	53.55	53.8	52.525	54.4	54.325	53.75																					54.25	59.375	61.5	59.575	63.95	62.95	67.2	61.225	61.125	58.05	59.1	61.45	57.55	64.475	61.675	57.775
PLC15	103.675	104.075	124.45	126	137.5	157.55	158.7	171.75	148.95	191.5																					79.225	77.05	77.95	82.425	99.8	92.15	93.25	97.35	86.725	92.225
PLC17	55.975	62.3	69.275	59.95	75.275	79.825	70.075																								71.875	99.5	125.625	87.6	141.725	110.675	85.5	117.475	133.525	115.6
PLC18	60.275	69.675	75	69.525	83.3	81.075	81.425	102.2	104.025	101.725	96.7	114.525	132.275																		61.35	67.5	75.525	67.175	73.575	82.15	72.8	90.45	88.1	81.375	101.55	95	91.475
PLC19	52.125	54.7	56.25	54.5	60.6	61.425	58.6																								59.1	59.55	60.85	60.175	62.075	62.075	61.525	65.075	65.85	62.75	68.775	71.075	63.325
PLC20	71.575	76.825	84.9	82.175	90.2	98.225	90.55	102.975	91.5	101.15																					54.4	56.4	59.425	56.85	63.75	69.575	60.1	71.575	71.95	67.675
PLC21	85.625	111.3	117.9	109.95	160.225	156.475	135.6																								94.8	135.2	132.3	124.625	168.65	194.975	141	217.075	206.375	185.975
PLC22	63.975	84.1	87.45	82.325	93.775	89.25	92.425	98.475	108.225	103.5	91.475	111.975	120.05	108.525	132.75	114.225															55.85	67.35	70.675	66.05	79.65	78.75	67.325	84.775	83.575	75.25	83.5	70.825	81.25	91.55	78.15	82.8
PLC25	57.65	58.95	61.35	60.4	60.975	62.4	63.75	64.675	61.875	65.725	67.025	61.15	68.65																		58.5	60.275	62.175	61.95	63.075	62.125	62.175	65.625	65.8	64.025	66.6	56.625	65.425
																				1
																				2
																				3
																				4
																				5
																				6
																				7
																				8
																				9
																				10
																				11
																				12
																				13
																				14
																				15
																				16
																				17
[truncated: 11 more columns]

## Sheet: MUAP Slope
ID	Group (F=0, NF=1)	Sex (Male=0, Female =1)	PRE Slope (mV/contraction)	POST Slope (mV/contraction)	Pre Mean MUAP Amplitude Beg	Pre Mean MUAP Amplitude Mid	Pre Mean MUAP Amplitude End	Post Mean MUAP Amplitude Beg	Post Mean MUAP Amplitude Mid	Post Mean MUAP Amplitude End
PLC01	0	0	0.0269	0.0439	0.0638581	0.137297	0.125882	0.0991765	0.222503	0.268617
PLC02	1	0	0.0189	0.0046	0.161382	0.189	0.199259	0.114974	0.142276	0.130454
PLC05	1	1	-0.0007	0.002	0.0555064	0.0609884	0.0527053	0.0441169	0.0638898	0.0557489
PLC06	0	1	0.0079	0.0136	0.103219	0.127152	0.13762	0.0907714	0.125467	0.173411
PLC07	1	0	0.0241	0.0144	0.1188	0.214074	0.218446	0.104824	0.144711	0.180863
PLC08	1	0	0.0299	0.0402	0.218539	0.271212	0.344579	0.216075	0.453358	0.451488
PLC10	1	0	0.0347	0.0069	0.224196	0.267093	0.293553	0.106936	0.170089	0.124369
PLC11	0	0	0.1243	0.0591	0.195238	0.69204	0.800338	0.167018	0.269128	0.413021
PLC13	1	1	0.0132	0.0132	0.071577	0.159245	0.123415	0.0897937	0.106934	0.152203
PLC14	0	1	-0.0009	0.0003	0.0801713	0.103461	0.0773708	0.0864696	0.108781	0.0783055
PLC15	1	0	0.079	0.0211	0.273319	0.511462	0.485744	0.178818	0.232904	0.241557
PLC17	0	0	0.0277	0.0463	0.136183	0.135688	0.19163	0.223682	0.298874	0.35106
PLC18	1	1	0.0232	0.0189	0.157977	0.210937	0.247998	0.135922	0.22042	0.213476
PLC19	0	1	0.0187	0.0053	0.0558325	0.107296	0.093135	0.0424068	0.0596736	0.0611872
PLC20	0	0	0.0263	0.0204	0.17047	0.229072	0.245839	0.0834493	0.143457	0.141473
PLC21	0	0	0.0743	0.0583	0.322485	0.383069	0.471041	0.317547	0.449599	0.503179
PLC22	1	1	0.0189	0.008	0.124371	0.196902	0.211808	0.133346	0.169645	0.178346
PLC25	0	1	0.0096	0.0053	0.130772	0.149901	0.169051	0.109526	0.119179	0.12268

## Sheet: All Results
ID	Group (F=0, NF=1)	Sex (Male=0, Female =1)	Age	Height_cm	Pre_Mass_kg	Self Reported Training Age (years)	Pre constant torque time	Post constant torque time	PRE Torque BEG	PRE Torque MID	PRE Torque END	POST Torque BEG	POST Torque MID	POST Torque END	PRE EMG BEG	PRE EMG MID	PRE EMG END	POST EMG BEG	POST EMG MID	POST EMG END	PRE MUAP Slope (mV/contraction)	POST MUAP Slope (mV/contraction)	Pre Mean MUAP Amplitude Beg	Pre Mean MUAP Amplitude Mid	Pre Mean MUAP Amplitude End	Post Mean MUAP Amplitude Beg	Post Mean MUAP Amplitude Mid	Post Mean MUAP Amplitude End
PLC01	0	0	27	196	146.3	12	155.3	203.6	3.77998	1.79878	6.15789	0.02383	3.68462	3.85625	42.3	52.575	67.65	53.8	57.425	70.7	0.0269	0.0439	0.0638581	0.137297	0.125882	0.0991765	0.222503	0.268617
PLC02	1	0	27	183.8	121.6	14	71.9	100.9	2.1175	3.35726	10.1941	0.01635	4.30756	5.28282	59.2	83.225	74.775	57.2	78.325	81.3	0.0189	0.0046	0.161382	0.189	0.199259	0.114974	0.142276	0.130454
PLC03	0	0	30	184.5	86.4	4	67.3	101.3	2.60925	1.75344	2.9694	0.01218	1.11174	1.31156
PLC05	1	1	25	166.3	69.1	3	237.7	377.7	2.67316	2.45421	3.74898	0.00727	1.56085	19.3993	50.325	51.2	50.975	50.35	52.375	54	-0.0007	0.002	0.0555064	0.0609884	0.0527053	0.0441169	0.0638898	0.0557489
PLC06	0	1	23	171.2	61.6	7	193.5	241.2	1.11181	3.2583	7.91441	0.00484	1.13394	2.32304	52.625	62.125	71.7	56.325	61.1	78.5	0.0079	0.0136	0.103219	0.127152	0.13762	0.0907714	0.125467	0.173411
PLC07	1	0	21	182	81.4	7	237.5	191.1	1.85038	1.35547	2.41473	0.00914	1.58429	3.52062	59.875	73.825	105.7	60.325	83.675	73.475	0.0241	0.0144	0.1188	0.214074	0.218446	0.104824	0.144711	0.180863
PLC08	1	0	26	176.8	85.4	10	209.6	256.5	5.39564	2.95217	3.33017	0.03321	2.41407	2.88832	63.275	118.15	156.45	76.7	131.05	162.175	0.0299	0.0402	0.218539	0.271212	0.344579	0.216075	0.453358	0.451488
PLC10	1	0	21	183	89	4	67	144.42	2.28199	2.81176	5.40212	0.00703	5.85889	6.28365	84.95	110.775	121.55	55.675	59.725	63.575	0.0347	0.0069	0.224196	0.267093	0.293553	0.106936	0.170089	0.124369
PLC11	0	0	22	176.2	76.6	5	193.9	198.7	1.83998	2.12747	4.79581	0.01519	2.60056	5.40445	84.375	206.95	346.4	59.875	69.875	134.525	0.1243	0.0591	0.195238	0.69204	0.800338	0.167018	0.269128	0.413021
PLC13	1	1	26	162.9	61.5	12	192.8	239.2	3.51284	5.18568	4.67684	0.01725	4.03664	6.27649	57.875	73.65	81.15	53.8	58.55	78.775	0.0132	0.0132	0.071577	0.159245	0.123415	0.0897937	0.106934	0.152203
PLC14	0	1	25	162.4	61.5	6	105.5	194.5	4.11347	3.29987	10.225	0.02513	3.47473	6.7001	48.95	53.8	54.325	54.25	61.125	61.675	-0.0009	0.0003	0.0801713	0.103461	0.0773708	0.0864696	0.108781	0.0783055
PLC15	1	0	21	174.9	80	2	100.4	150.1	3.28047	2.8959	3.7162	0.00541	1.88377	2.17724	103.675	157.55	148.95	79.225	92.15	86.725	0.079	0.0211	0.273319	0.511462	0.485744	0.178818	0.232904	0.241557
PLC17	0	0	24	169.7	68.6	1	64.5	107.1	2.84604	1.70789	4.38663	0.00896	1.94357	3.47633	55.975	59.95	79.825	71.875	110.675	133.525	0.0277	0.0463	0.136183	0.135688	0.19163	0.223682	0.298874	0.35106
PLC18	1	1	26	163	62.4	0.5	152.9	154.9	2.74091	3.85577	5.50882	0.00612	2.32542	4.04884	60.275	81.425	114.525	61.35	72.8	95	0.0232	0.0189	0.157977	0.210937	0.247998	0.135922	0.22042	0.213476
PLC19	0	1	21	155.6	63.1	2	60.5	147.7	2.80486	0.911695	5.29852	0.01192	4.11098	6.03669	52.125	54.5	61.425	59.1	61.525	71.075	0.0187	0.0053	0.0558325	0.107296	0.093135	0.0424068	0.0596736	0.0611872
PLC20	0	0	22	183.3	88.5	5	61.9	102.5	4.63835	2.35297	4.38729	0.01339	3.34439	5.74297	71.575	98.225	91.5	54.4	69.575	71.95	0.0263	0.0204	0.17047	0.229072	0.245839	0.0834493	0.143457	0.141473
PLC21	0	0	22	177.4	82.3	8	65.6	151.9	1.32671	1.56401	2.67539	0.0076	3.67651	3.62324	85.625	109.95	156.475	94.8	194.975	206.375	0.0743	0.0583	0.322485	0.383069	0.471041	0.317547	0.449599	0.503179
PLC22	1	1	24	171.5	64.3	9	191.2	198.3	1.30668	8.92025	2.12202	0.00921	1.61963	1.2213	63.975	108.225	132.75	55.85	83.575	78.15	0.0189	0.008	0.124371	0.196902	0.211808	0.133346	0.169645	0.178346
PLC25	0	1	29	154	51.7	3	155.5	150	1.73312	3.34401	6.82717	0.00415	2.35752	7.3745	57.65	63.75	61.15	58.5	62.175	56.625	0.0096	0.0053	0.130772	0.149901	0.169051	0.109526	0.119179	0.12268
